# Supplementary material for: A sex-stratified analysis of the genetic architecture of human brain anatomy
Source: PubMed Central journal article supplement (PMC11399304; doi:10.1038/s41467-024-52244-2), 2024-09-13
Supplement: 41467_2024_52244_MOESM3_ESM.pdf [file 41467_2024_52244_MOESM3_ESM.pdf]

## **Description of Additional Supplementary Files**

File Name: Supplementary Data 1

Description: Demographic and phenotypes information for the study.

File Name: Supplementary Data 2

Description: SNP heritability of regional cortical gray matter volume (GMV)

File Name: Supplementary Data 3

Description: SNP heritability of regional cortical gray matter surface area (SA)

File Name: Supplementary Data 4

Description: SNP heritability of regional cortical thickness (CT)

File Name: Supplementary Data 5

Description: SNP heritability of global phenotypes

File Name: Supplementary Data 6

Description: SNP heritability of subcortical volumes

File Name: Supplementary Data 7

Description: Sex-difference in genetic variance VG, phenotypic variance VP and environmental variance VE

File Name: Supplementary Data 8

Description: Models investigating sex-difference in the relationship between genetic variance VG and phenotypic variance VP

File Name: Supplementary Data 9

Description: Between-sex genetic correlation ( $r_g$ ) of regional gray matter volume (GMV)

File Name: Supplementary Data 10

Description: Between-sex genetic correlation ( $r_g$ ) of regional surface area (SA)

File Name: Supplementary Data 11

Description: Between-sex genetic correlation ( $r_g$ ) of regional cortical thickness (CT)

File Name: Supplementary Data 12

Description: Between-sex genetic correlation ( $r_g$ ) of global phenotypes

File Name: Supplementary Data 13

Description: Between-sex genetic correlation ( $r_g$ ) of subcortical volumes

File Name: Supplementary Data 14

Description: SNPs passing the "strict" significance threshold in SNP-level sex difference analyses

File Name: Supplementary Data 15

Description: Number of SNPs passing the "relaxed" significance threshold in SNP-level sex difference analyses

File Name: Supplementary Data 16

Description: Candidate SNPs and mapped genes from FUMA analysis of SNPs passing the "relaxed" threshold for regional GMV

File Name: Supplementary Data 17

Description: Candidate SNPs and mapped genes from FUMA analysis of SNPs passing the "relaxed" threshold for regional SA

File Name: Supplementary Data 18

Description: Candidate SNPs and mapped genes from FUMA analysis of SNPs passing the "relaxed" threshold for regional CT

File Name: Supplementary Data 19

Description: Candidate SNPs and mapped genes from FUMA analysis of SNPs passing the "relaxed" threshold for subcortical volumes

File Name: Supplementary Data 20

Description: Candidate SNPs and mapped genes from FUMA analysis of all SNPs passing the "relaxed" threshold for regional GMV

File Name: Supplementary Data 21

Description: Overlap between RBFOX1 sex-biased regions and functional networks

File Name: Supplementary Data 22

Description: Accession codes for the GWAS summary statistics deposited to public repository
